# Supplementary material for: Jagged 1 regulates the restriction of Sox2 expression in the developing chicken inner ear: a mechanism for sensory organ specification
Source: Oxford University Press journal article supplement (doi:10.1242/dev.060657), 2011-01-25
Supplement: dev060657tables1.pdf [file dev060657tables1.pdf]

**Table S1. Primers (5' to 3') for qRT-PCR**

| Gene           | Forward                  | Reverse                  |
|----------------|--------------------------|--------------------------|
| <i>Gapdh</i>   | TTGGCATTGTGGAGGGTCTT     | GTGGACGCTGGGATGATGTT     |
| <i>Sox2</i>    | AAGAGACCCTTCATTGACGA     | CGTGTACTTATCCTTCTTCATCAG |
| <i>Sox2HMG</i> | ACAACGCGGGCGCAGAT        | GTCCCTTGCTGGGAGTACGA     |
| <i>cJag1</i>   | TGCCAGACGGTGCTAAGTG      | TCGAGGACCACACCAAACC      |
| <i>hJag1</i>   | GTTCTCCTAATAACTGTTCCCA,  | CCATTAACCAAATCCCGACAG    |
| <i>DI1</i>     | TAACTCCGATAAAAACGCCTACAA | GCCATGCTCCTCTTTCACAG     |
| <i>Hairy1</i>  | GGCGCGCATCAACGA          | TGGAGGTTCCCTCAGGTGCTT,   |
| <i>Hes5</i>    | GAAATCCTGACACCCAAAGAG    | TCAATGCTGCTGTTAATCCT     |
| <i>Hey1</i>    | CGGAGGGAAAGGTTATTTTCG    | CAGCAATGGGTGAGATATGTG    |
| <i>Hey2</i>    | CAACCACAACATCTCAGATTATG  | CAACTTCAGTCAAGCACTCC,    |
| <i>Notch1</i>  | GAACAATAAGGAGGAGACCC     | TTTCGTAGCTCCCTTCTCTG     |
| <i>Ngn1</i>    | AGCGGAACCGCATGCA         | AGGGCCCAGATGTAGTTGTAAGC  |
